# Supplementary material
Source: publisher site journal article supplement (https://www.dovepress.com/get_supplementary_file.php?f=253730.docx)
Supplement: Supplementary file 1 [file get_supplementary_file.php]

**Supplementary Figure 1**

**
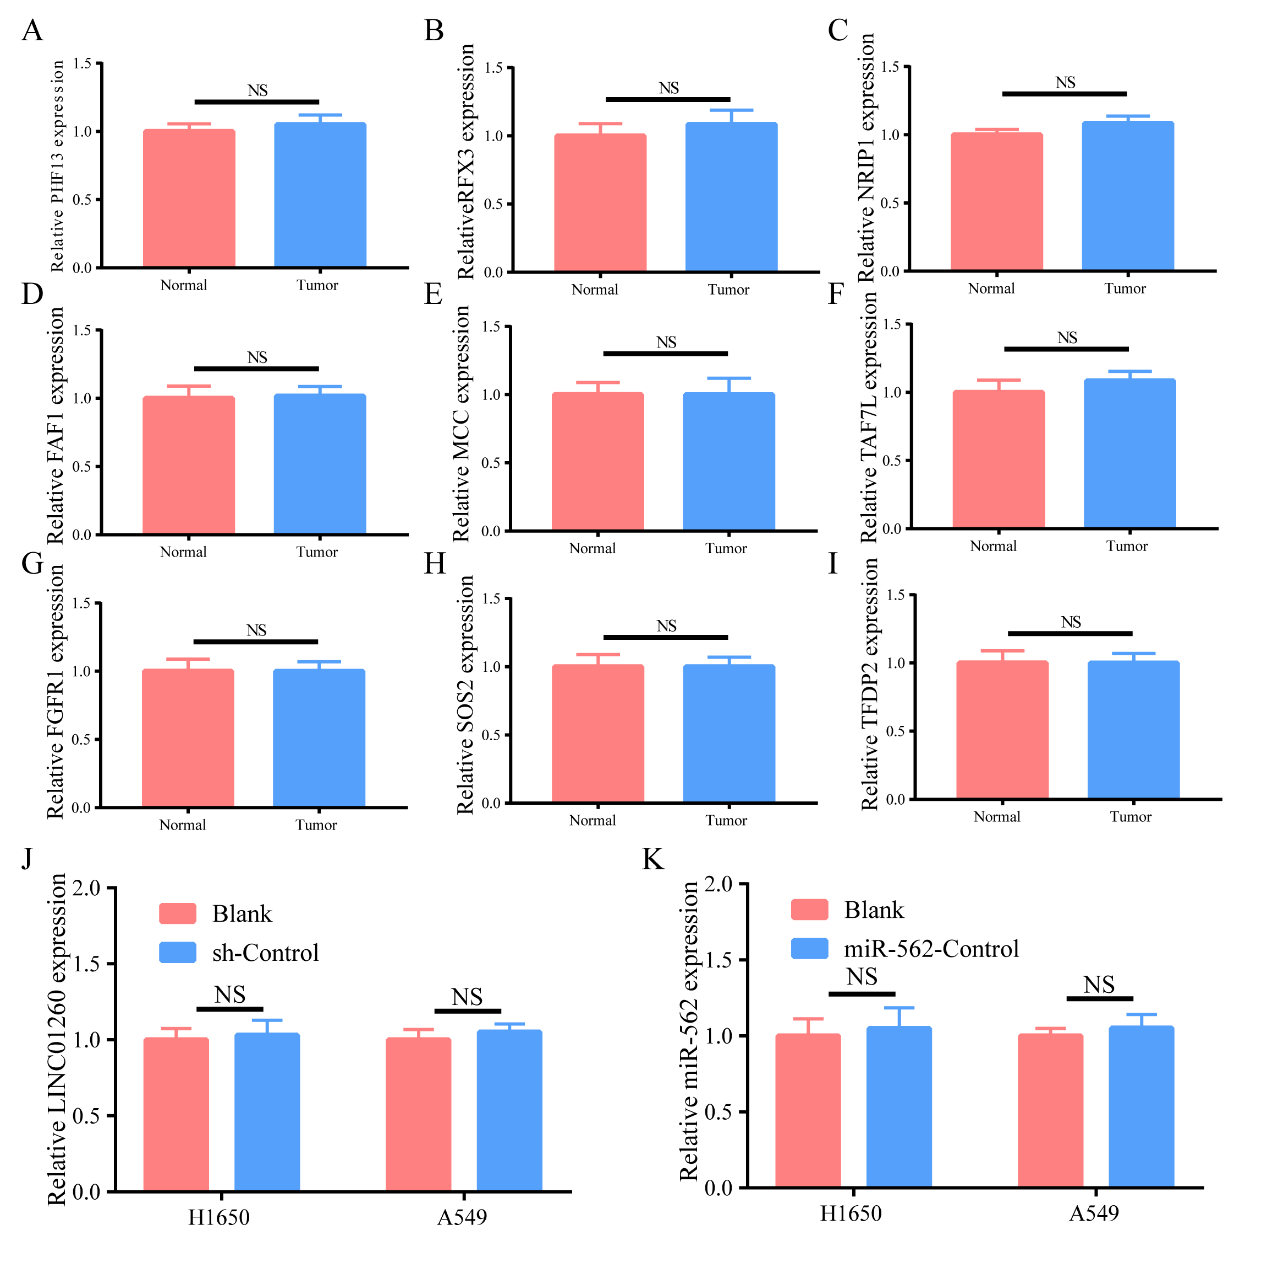
**

**Supplementary Figure 1:** The expression of other potential target genes of miR-562 in NSCLC tissues. NS *p*>0.05.
